# Supplementary material for: Habitual Dietary Intake Affects the Altered Pattern of Gut Microbiome by Acarbose in Patients with Type 2 Diabetes
Source: MDPI journal article supplement (doi:10.3390/nu13062107), 2021-06-19
Supplement: s1 [file s1]

# Supplementary Figure S1

A

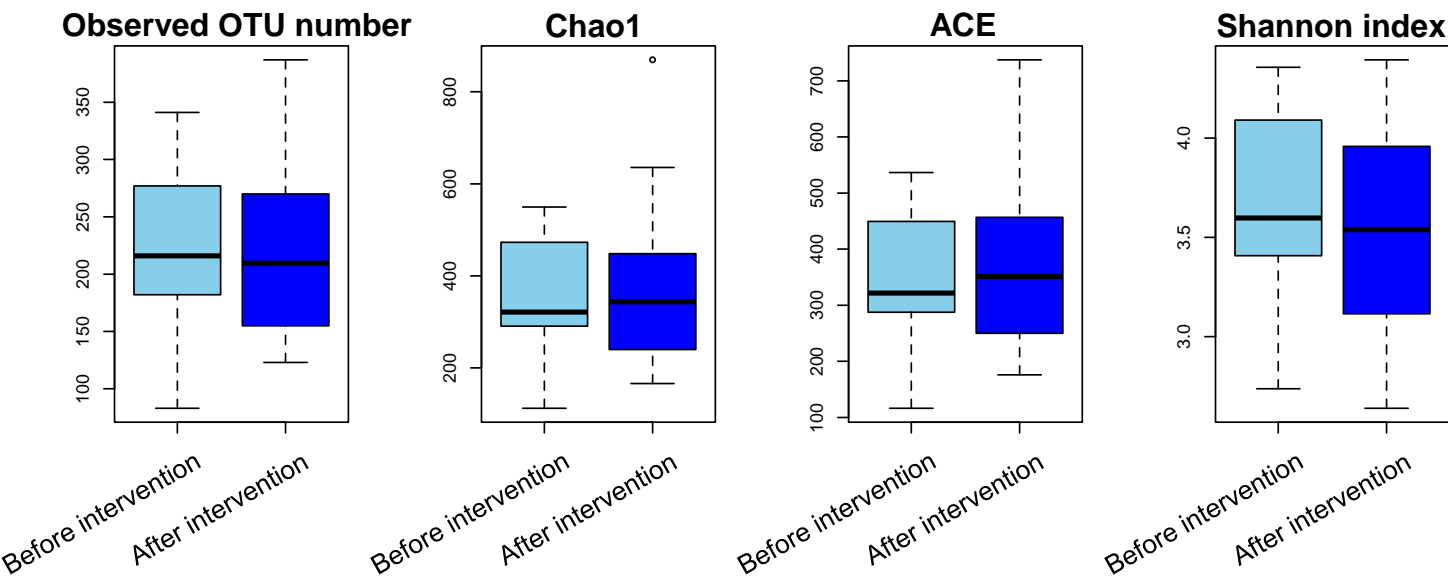

B

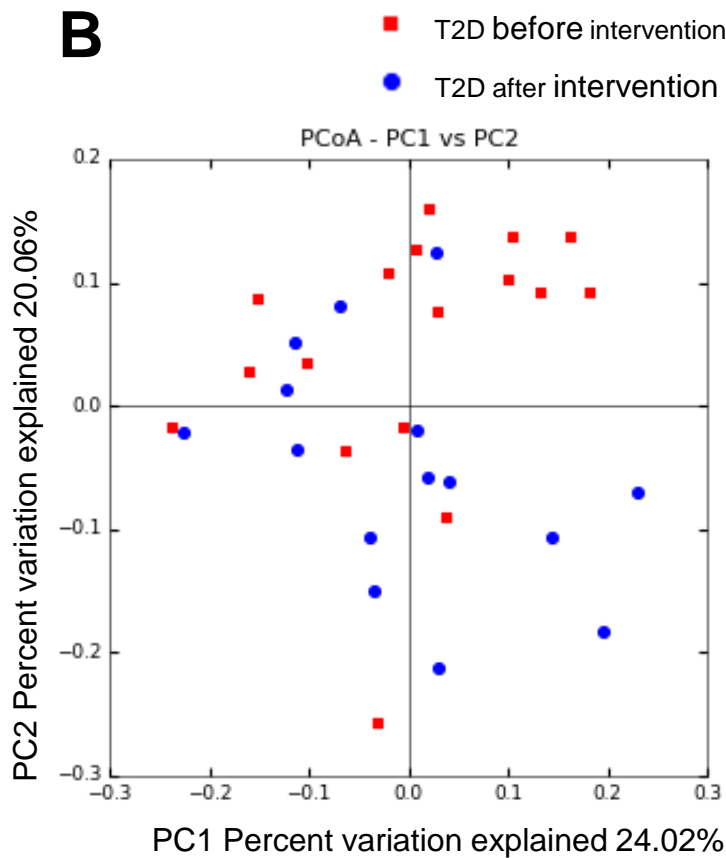

C

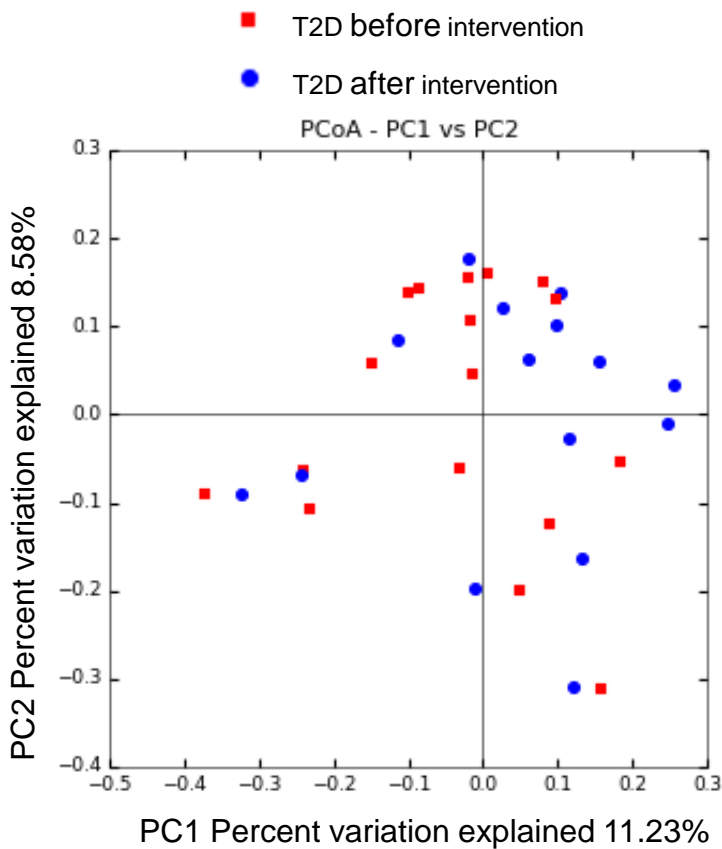

D

| Category                                                                  | No. subject | Weighted UniFrac |         | Unweighted UniFrac |         |
|---------------------------------------------------------------------------|-------------|------------------|---------|--------------------|---------|
|                                                                           |             | R <sup>2</sup>   | p-value | R <sup>2</sup>     | p-value |
| T2D before intervention of acarbose vs T2D after intervention of acarbose | 18          | 0.05             | 0.10    | 0.02               | 0.93    |

(A) Alpha diversity indexes. Comparisons of the observed and Chao 1-estimated operational taxonomic units (OTU number), the abundance-based coverage estimator (ACE), and the Shannon index of gut microbiome before and after the intervention of acarbose based on 16S analysis. Each box plot shows median, interquartile range, minimum, and maximum values. (B, C) Beta diversity indexes based on UniFrac analysis. Weighted (B) and unweighted (C) UniFrac-principal coordinate analysis (PCoA) of gut microbiome for patients with type 2 diabetes (T2D) before and after the intervention of acarbose based on 16S data. (D) Permutational multivariate analysis of variance of the gut microbiome samples between the two groups based on 16S data.

# Supplementary Figure S2

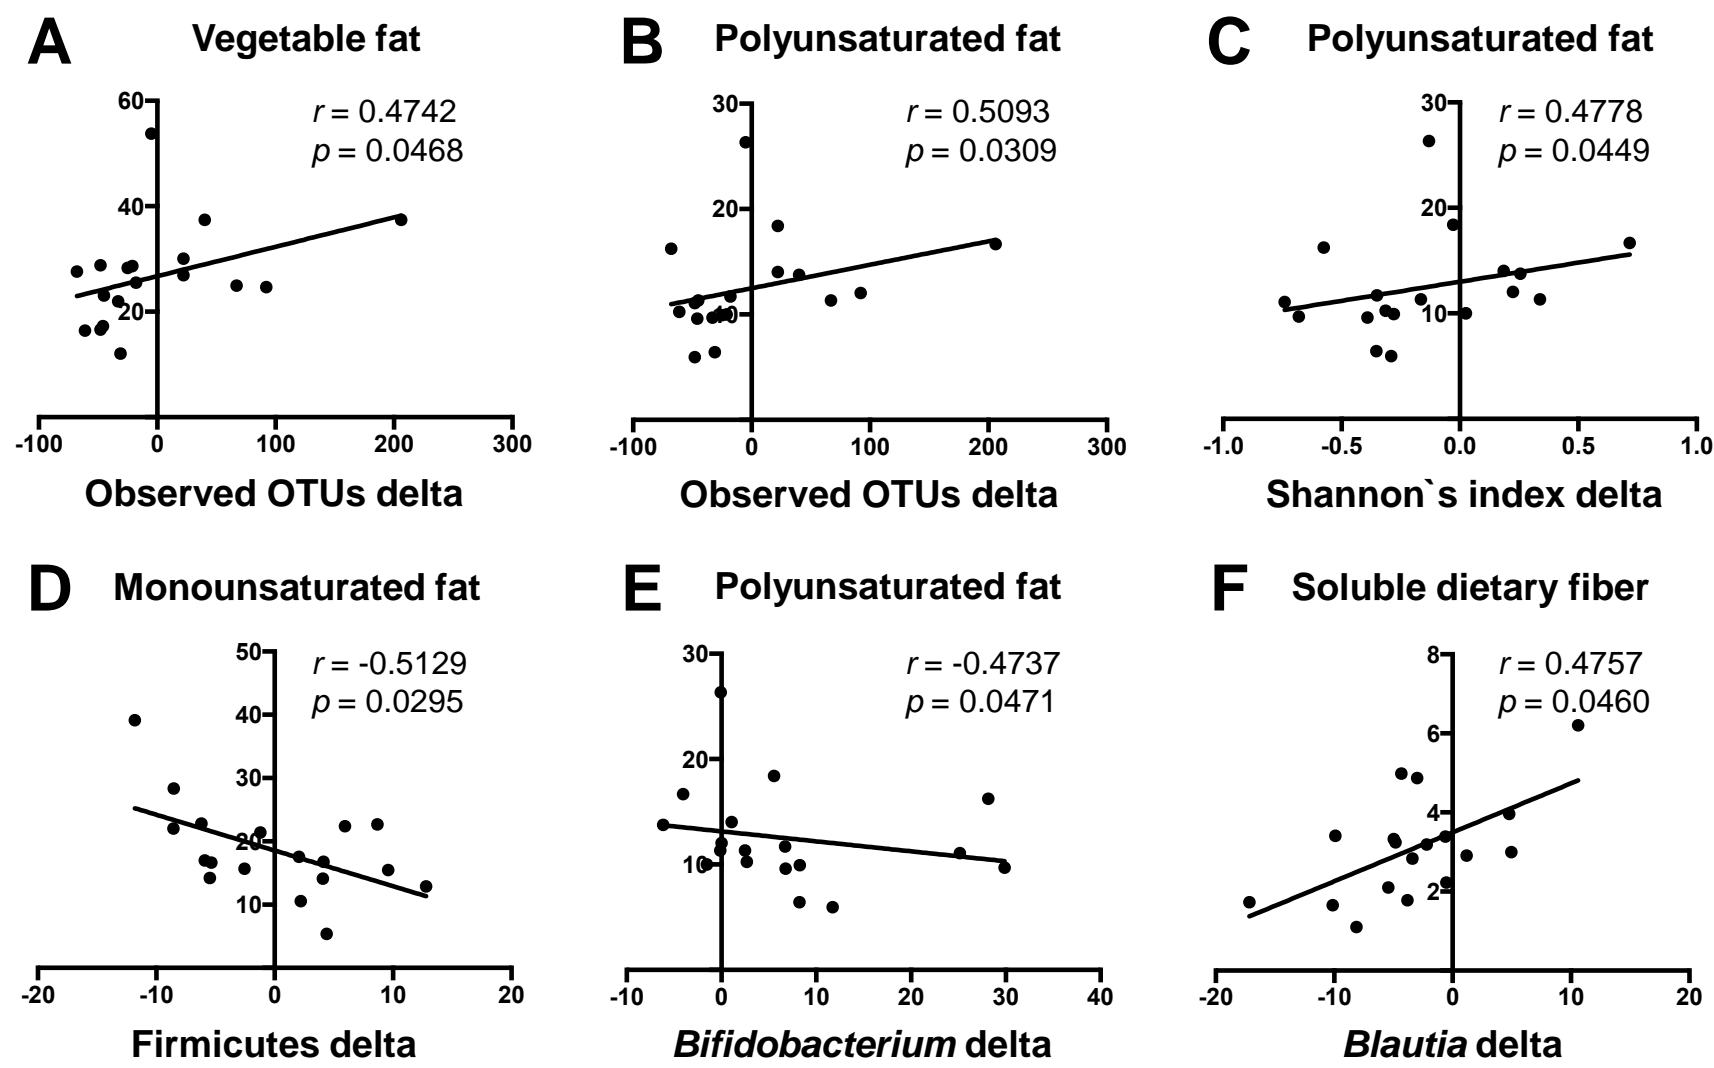

(A-F) Spearman's correlation between the relative abundance delta of microbial data and habitual dietary nutrient intake with statistical significance. X delta = X after intervention – X before intervention.

# Supplementary Table S1

| Average relative abundance (%) |                     |                     |
|--------------------------------|---------------------|---------------------|
| Phylum                         | Before intervention | After intervention  |
| Firmicutes                     | 58.17 ± 2.38        | 58.08 ± 2.85        |
| <b>Bacteroidetes *</b>         | <b>24.98 ± 2.34</b> | <b>16.89 ± 1.65</b> |
| <b>Actinobacteria *</b>        | <b>10.43 ± 2.36</b> | <b>18.17 ± 2.73</b> |
| Proteobacteria                 | 2.53 ± 0.45         | 1.80 ± 0.29         |
| Verrucomicrobia                | 1.60 ± 0.89         | 2.94 ± 1.19         |
| Fusobacteria                   | 0.51 ± 0.28         | 0.01 ± 0.003        |

Comparison of the relative abundance at the phylum level before and after the intervention of the acarbose based on 16S data. Phyla with an average relative abundance ≥0.1% in either of the two groups are represented. Data are represented as mean ± SEM. \**p* <0.05 based on the paired t test.

# Supplementary Table S2

| Genus                          | Average relative abundance (%) |                    |
|--------------------------------|--------------------------------|--------------------|
|                                | Before intervention            | After intervention |
| <i>Bifidobacterium</i> *       | 7.16 ± 2.26                    | 14.09 ± 2.62       |
| <i>Bacteroides</i> *           | 13.61 ± 1.36                   | 8.86 ± 1.07        |
| <i>Blautia</i> *               | 12.17 ± 1.75                   | 9.02 ± 1.87        |
| <i>Prevotella</i> *            | 7.34 ± 2.53                    | 4.24 ± 1.56        |
| <i>Eubacterium</i> *           | 2.48 ± 0.63                    | 6.75 ± 1.85        |
| <i>Faecalibacterium</i>        | 5.45 ± 1.21                    | 4.26 ± 0.76        |
| <i>Megamonas</i>               | 4.82 ± 1.89                    | 1.59 ± 0.78        |
| <i>Streptococcus</i>           | 4.77 ± 1.50                    | 4.75 ± 1.56        |
| <i>Megasphaera</i> *           | 2.15 ± 0.59                    | 3.91 ± 0.94        |
| <i>Fusicatenibacter</i>        | 1.94 ± 0.41                    | 3.86 ± 1.69        |
| <i>Collinsella</i>             | 2.90 ± 0.64                    | 3.72 ± 0.79        |
| <i>Clostridium</i> *           | 3.06 ± 0.46                    | 1.77 ± 0.36        |
| <i>Akkermansia</i>             | 1.60 ± 0.89                    | 2.94 ± 1.19        |
| <i>Lactobacillus</i> *         | 0.89 ± 0.61                    | 2.86 ± 0.84        |
| <i>Subdoligranulum</i>         | 1.98 ± 0.56                    | 2.64 ± 0.65        |
| <i>Ruminococcus</i>            | 2.40 ± 0.68                    | 1.81 ± 0.50        |
| <i>Dorea</i>                   | 2.07 ± 0.42                    | 1.74 ± 0.33        |
| <i>Parabacteroides</i>         | 1.75 ± 0.37                    | 1.51 ± 0.42        |
| <i>Alistipes</i>               | 1.47 ± 0.51                    | 1.61 ± 0.84        |
| <i>Acidaminococcus</i>         | 1.13 ± 0.36                    | 1.30 ± 0.46        |
| <i>Veillonella</i>             | 0.80 ± 0.39                    | 1.08 ± 0.52        |
| <i>Phascolarctobacterium</i> * | 0.93 ± 0.23                    | 0.50 ± 0.15        |
| <i>Lachnoclostridium</i> *     | 0.92 ± 0.17                    | 0.59 ± 0.12        |
| <i>Anaerostipes</i>            | 0.87 ± 0.39                    | 0.68 ± 0.21        |
| <i>Escherichia</i>             | 0.79 ± 0.30                    | 0.67 ± 0.26        |
| <i>Holdemanella</i>            | 0.73 ± 0.31                    | 0.76 ± 0.37        |
| <i>Catenibacterium</i>         | 0.68 ± 0.33                    | 0.45 ± 0.23        |
| <i>Sutterella</i>              | 0.65 ± 0.16                    | 0.50 ± 0.14        |
| <i>Dialister</i>               | 0.60 ± 0.27                    | 0.47 ± 0.16        |
| <i>Roseburia</i>               | 0.33 ± 0.10                    | 0.57 ± 0.31        |
| <i>Oscillibacter</i>           | 0.52 ± 0.14                    | 0.50 ± 0.18        |
| <i>Fusobacterium</i>           | 0.51 ± 0.28                    | 0.01 ± 0.003       |

Comparison of the relative abundance at the genus level before and after the intervention of acarbose based on 16S data. Genera with an average relative abundance ≥0.5% in either of the two groups are represented. Data are represented as mean ± SEM. \**p* <0.05 based on the paired t-test.

# Supplementary Table S3

| Dietary component          | median | (range)       |
|----------------------------|--------|---------------|
| Carbohydrate, g            | 219.0  | (115.5—442.7) |
| Sucrose, g                 | 13.6   | (1.0—36.2))   |
| Soluble dietary fiber, g   | 3.1    | (1.1—6.2)     |
| Insoluble dietary fiber, g | 8.6    | (4.4—15.1)    |
| Animal fat, g              | 21.7   | (6.4—46.5)    |
| Vegetable fat, g           | 26.2   | (12.1—53.8)   |
| Saturated fat, g           | 13.8   | (4.1—23.6)    |
| Monounsaturated fat, g     | 16.9   | (5.4—39.1)    |
| Polyunsaturated fat, g     | 11.3   | (6.0—26.3)    |
| Cholesterol,mg             | 387.8  | (174.0—827.0) |
| Animal protein, g          | 44.8   | (14.3—84.4)   |
| Vegetable protein, g       | 28.5   | (14.4—44.5)   |

Intake of each dietary component based on a Brief type self administered Diet History Questionnaire (BDHQ) among the total 18 subjects. Data are represented as median (range).

# Supplementary Table S4

| Spearman`s correlation |                              | Habitual dietary essential nutrient intake |         |                       |                         |            |               |               |                     |                     |             |                |                   |
|------------------------|------------------------------|--------------------------------------------|---------|-----------------------|-------------------------|------------|---------------|---------------|---------------------|---------------------|-------------|----------------|-------------------|
| Item                   | Microbial data delta         | Carbohydrate                               | Sucrose | Soluble dietary fiber | Insoluble dietary fiber | Animal fat | Vegetable fat | Saturated fat | Monounsaturated fat | Polyunsaturated fat | Cholesterol | Animal protein | Vegetable protein |
| Alpha diversity        | Observed OTUs delta          | 0.18                                       | -0.35   | 0.17                  | 0.19                    | -0.04      | <b>0.47*</b>  | 0.03          | 0.23                | <b>0.51*</b>        | 0.31        | 0.17           | 0.21              |
|                        | Shannon's index delta        | 0.09                                       | -0.23   | 0.11                  | 0.08                    | 0.07       | 0.42          | 0.19          | 0.33                | <b>0.48*</b>        | 0.32        | 0.18           | 0.08              |
| Phylum                 | Firmicutes delta             | -0.15                                      | -0.08   | -0.10                 | -0.11                   | -0.43      | -0.24         | -0.43         | <b>-0.51*</b>       | -0.32               | -0.38       | -0.32          | -0.06             |
|                        | Bacteroidetes delta          | -0.03                                      | -0.19   | -0.14                 | -0.12                   | 0.14       | 0.28          | 0.23          | 0.33                | 0.28                | 0.16        | -0.04          | -0.16             |
|                        | Actinobacteria delta         | -0.04                                      | 0.20    | 0.12                  | 0.11                    | -0.25      | -0.31         | -0.36         | -0.38               | -0.38               | -0.26       | -0.16          | 0.11              |
|                        | Proteobacteria delta         | -0.13                                      | -0.15   | -0.05                 | -0.15                   | 0.26       | -0.01         | 0.09          | 0.10                | 0.03                | 0.02        | 0.03           | -0.18             |
| Genus                  | <b>Bifidobacterium</b> delta | -0.14                                      | 0.33    | 0.001                 | -0.03                   | -0.22      | -0.44         | -0.33         | -0.41               | <b>-0.47*</b>       | -0.29       | -0.21          | -0.03             |
|                        | <i>Bacteroides</i> delta     | 0.11                                       | 0.04    | 0.22                  | 0.15                    | -0.06      | 0.36          | 0.07          | 0.25                | 0.42                | 0.16        | -0.01          | 0.10              |
|                        | <b>Blautia</b> delta         | 0.13                                       | 0.08    | <b>0.48*</b>          | 0.40                    | 0.07       | 0.12          | -0.15         | 0.16                | 0.39                | 0.21        | 0.20           | 0.33              |
|                        | <i>Prevotella</i> delta      | -0.14                                      | -0.26   | -0.22                 | -0.14                   | -0.19      | 0.02          | -0.22         | -0.16               | -0.20               | -0.32       | -0.43          | -0.20             |
|                        | <i>Eubacterium</i> delta     | 0.11                                       | 0.20    | -0.07                 | -0.04                   | -0.36      | 0.09          | -0.01         | -0.10               | -0.31               | -0.06       | -0.21          | -0.02             |

| Z score         |                              | Habitual dietary essential nutrient intake |         |                       |                         |            |               |               |                     |                     |             |                |                   |
|-----------------|------------------------------|--------------------------------------------|---------|-----------------------|-------------------------|------------|---------------|---------------|---------------------|---------------------|-------------|----------------|-------------------|
| Item            | Microbial data delta         | Carbohydrate                               | Sucrose | Soluble dietary fiber | Insoluble dietary fiber | Animal fat | Vegetable fat | Saturated fat | Monounsaturated fat | Polyunsaturated fat | Cholesterol | Animal protein | Vegetable protein |
| Alpha diversity | Observed OTUs delta          | -1.48                                      | 1.20    | 0.25                  | 0.51                    | 1.28       | 0.73          | 1.28          | 1.38                | 1.21                | 0.97        | 0.65           | 1.49              |
|                 | Shannon's index delta        | -0.91                                      | 1.25    | 0.78                  | 1.24                    | 1.32       | 1.11          | 1.20          | 1.21                | 0.40                | 0.30        | 0.33           | 0.75              |
| Phylum          | Firmicutes delta             | -0.20                                      | -1.23   | -1.63                 | -1.60                   | -1.47      | -2.06         | -0.98         | -1.07               | -0.48               | -0.86       | -0.78          | -1.23             |
|                 | Bacteroidetes delta          | -0.72                                      | 0.16    | 1.12                  | 1.42                    | 0.68       | 1.11          | 0.66          | 0.73                | -1.10               | -0.92       | -0.99          | -0.24             |
|                 | Actinobacteria delta         | 1.12                                       | -0.43   | -0.76                 | -1.28                   | -0.99      | -1.56         | -1.14         | -1.31               | 0.59                | 0.48        | 0.38           | -0.32             |
|                 | Proteobacteria delta         | -0.53                                      | 0.51    | 1.70                  | 0.78                    | 0.13       | 0.24          | -0.02         | -0.27               | -1.23               | -1.10       | -0.51          | -1.06             |
| Genus           | <b>Bifidobacterium</b> delta | 1.74                                       | -0.68   | -0.62                 | -1.14                   | -1.11      | -1.68         | -1.39         | -1.76               | -0.29               | -0.37       | -0.24          | -1.14             |
|                 | <i>Bacteroides</i> delta     | 0.37                                       | 0.31    | 0.15                  | 0.69                    | 0.68       | 0.81          | 1.04          | 1.00                | 0.52                | 0.72        | 0.91           | 0.91              |
|                 | <b>Blautia</b> delta         | 0.56                                       | 1.35    | 0.78                  | -0.32                   | 0.88       | 0.47          | 0.95          | 0.18                | 1.96                | 2.24        | 2.28           | 1.08              |
|                 | <i>Prevotella</i> delta      | -1.06                                      | -1.77   | -0.47                 | -0.64                   | -1.23      | -0.73         | -0.65         | -0.17               | -1.35               | -1.04       | -1.41          | -1.14             |
|                 | <i>Eubacterium</i> delta     | 1.12                                       | -0.68   | -1.30                 | 0.32                    | -0.19      | -0.51         | -0.95         | 0.07                | -0.23               | -0.43       | -0.62          | 0.91              |

Spearman`s correlation of habitual dietary nutrient intake with the observed OTU number delta, Shannon index delta, and average relative abundance delta of the top four phyla and top five genera. \**p* <0.05 based on the spearman`s rank correlation coefficient. Raw Z scores based on Spearman`s r in the analysis of correlation between habitual dietary nutrient intake and the observed OTU number delta, Shannon index delta, and average relative abundance delta of the top four phyla and top five genera. X delta = X after intervention – X before intervention.

# Supplementary Table S5

| Participants' clinical characteristics |     |     |                     |          |                      |                 |                 |                |     |     |          |          |               |               |
|----------------------------------------|-----|-----|---------------------|----------|----------------------|-----------------|-----------------|----------------|-----|-----|----------|----------|---------------|---------------|
| No.                                    | sex | age | dose of<br>acarbose | duration | abdominal<br>surgery | retinopath<br>y | nephropat<br>hy | neuropath<br>y | CVD | CAD | BMI (0w) | BMI (4w) | HbA1c<br>(0w) | HbA1c<br>(4w) |
| A0                                     | M   | 70  | 150                 | 13       | No                   | NDR             | 1               | No             | No  | No  | 22.7     | 22.7     | 7.2           | 7.1           |
| A1                                     | M   | 72  | 150                 | 7        | Yes                  | NDR             | 1               | No             | No  | No  | 24.0     | 24.0     | 8             | 7.3           |
| A2                                     | F   | 71  | 150                 | 9        | No                   | NDR             | 1               | No             | No  | No  | 23.5     | 23.5     | 7.6           | 7.5           |
| A3                                     | M   | 64  | 300                 | 11       | No                   | NDR             | 2               | Yes            | No  | No  | 26.7     | 26.7     | 6.8           | 7.9           |
| A4                                     | F   | 73  | 300                 | 13       | No                   | SDR             | 1               | No             | No  | No  | 24.2     | 24.2     | 6.6           | 7.1           |
| A5                                     | F   | 75  | 300                 | 7        | No                   | NDR             | 2               | No             | No  | No  | 19.0     | 19.0     | 8             | 7.4           |
| A6                                     | F   | 73  | 150                 | 5        | No                   | NDR             | 1               | No             | No  | No  | 22.2     | 22.2     | 8.7           | 7.6           |
| A8                                     | F   | 58  | 150                 | NA       | No                   | NDR             | 1               | No             | No  | No  | 26.8     | 26.8     | 6.9           | 6.7           |
| A9                                     | M   | 57  | 300                 | 10       | No                   | NDR             | 1               | No             | No  | No  | 22.7     | 22.6     | 8.6           | 7.5           |
| A10                                    | F   | 57  | 300                 | 6        | No                   | NDR             | 1               | No             | No  | No  | 23.9     | 23.4     | 6.8           | 6.5           |
| A11                                    | M   | 69  | 150                 | 14       | No                   | NDR             | 1               | No             | No  | No  | 21.6     | 21.6     | 9.9           | 8.4           |
| A12                                    | M   | 64  | 150                 | 14       | No                   | NDR             | 1               | Yes            | No  | No  | 23.0     | 23.0     | 6.9           | 6.8           |
| A13                                    | M   | 59  | 150                 | 8        | No                   | NDR             | 1               | No             | No  | No  | 22.7     | 22.8     | 6.7           | 6.4           |
| A14                                    | M   | 48  | 150                 | 28       | No                   | NDR             | 1               | No             | No  | No  | 35.9     | 35.9     | 7.9           | 7.6           |
| A15                                    | F   | 48  | 150                 | 2        | No                   | NDR             | 1               | No             | No  | No  | 34.6     | 34.6     | 9.2           | 9.6           |
| A16                                    | F   | 70  | 150                 | 13       | No                   | NDR             | 1               | No             | No  | No  | 21.9     | 21.5     | 7.1           | 6.9           |
| A17                                    | F   | 59  | 150                 | 1        | No                   | PDR             | 2               | Yes            | No  | No  | 22.5     | 22.5     | 8             | 7.3           |
| A18                                    | M   | 74  | 150                 | 19       | No                   | PPDR            | 3               | No             | No  | No  | 20.6     | 20.6     | 6.9           | 7.1           |

| Participants' clinical characteristics |     |         |     |        |           |         |         |           |        |     |            |  |
|----------------------------------------|-----|---------|-----|--------|-----------|---------|---------|-----------|--------|-----|------------|--|
| No.                                    | SU  | glinide | TZD | DPP4-i | metformin | SGLT2-i | insulin | ACE-i/ARB | statin | PPI | H2-blocker |  |
| A0                                     | Yes | No      | No  | Yes    | No        | No      | No      | Yes       | No     | No  | No         |  |
| A1                                     | Yes | No      | No  | Yes    | Yes       | No      | No      | No        | No     | No  | No         |  |
| A2                                     | No  | No      | No  | Yes    | Yes       | No      | No      | No        | No     | No  | No         |  |
| A3                                     | Yes | No      | No  | Yes    | Yes       | Yes     | Yes     | Yes       | No     | No  | No         |  |
| A4                                     | Yes | No      | No  | Yes    | Yes       | Yes     | No      | No        | Yes    | Yes | No         |  |
| A5                                     | No  | No      | No  | Yes    | Yes       | Yes     | No      | No        | Yes    | No  | No         |  |
| A6                                     | No  | No      | No  | Yes    | Yes       | No      | No      | No        | No     | No  | No         |  |
| A8                                     | No  | No      | No  | Yes    | Yes       | No      | No      | No        | Yes    | No  | No         |  |
| A9                                     | No  | Yes     | No  | Yes    | Yes       | Yes     | No      | Yes       | No     | No  | No         |  |
| A10                                    | Yes | No      | No  | Yes    | Yes       | No      | No      | No        | No     | No  | No         |  |
| A11                                    | No  | No      | No  | No     | Yes       | No      | Yes     | Yes       | No     | No  | No         |  |
| A12                                    | No  | No      | No  | Yes    | Yes       | No      | No      | Yes       | No     | No  | No         |  |
| A13                                    | No  | No      | No  | Yes    | No        | Yes     | No      | No        | No     | No  | No         |  |
| A14                                    | Yes | No      | Yes | Yes    | Yes       | Yes     | No      | Yes       | No     | No  | No         |  |
| A15                                    | No  | No      | No  | No     | No        | Yes     | No      | No        | No     | No  | No         |  |
| A16                                    | No  | No      | No  | No     | Yes       | Yes     | No      | No        | No     | No  | No         |  |
| A17                                    | No  | No      | No  | Yes    | Yes       | Yes     | No      | No        | No     | No  | No         |  |
| A18                                    | No  | No      | No  | Yes    | No        | Yes     | No      | Yes       | No     | Yes | No         |  |

| Participants' dietary intake |                  |         |                          |                            |            |                  |                  |                         |                         |             |                   |                      |
|------------------------------|------------------|---------|--------------------------|----------------------------|------------|------------------|------------------|-------------------------|-------------------------|-------------|-------------------|----------------------|
| No.                          | Carbohydrat<br>e | Sucrose | Soluble<br>dietary fiber | Insoluble<br>dietary fiber | Animal fat | Vegetable<br>fat | Saturated<br>fat | Monounsatu<br>rated fat | Polyunsatur<br>ated fat | Cholesterol | Animal<br>protein | Vegetable<br>protein |
| A0                           | 173.4            | 2.4     | 2.1                      | 5.6                        | 6.4        | 12.1             | 4.1              | 5.4                     | 6.4                     | 173.7       | 14.3              | 24.4                 |
| A1                           | 307.8            | 21.6    | 3.2                      | 9.9                        | 19.2       | 28.8             | 13.7             | 17.0                    | 11.1                    | 328.0       | 30.2              | 32.5                 |
| A2                           | 235.1            | 20.4    | 5.0                      | 13.1                       | 21.7       | 28.7             | 15.5             | 17.6                    | 10.0                    | 336.2       | 51.7              | 29.5                 |
| A3                           | 442.7            | 1.0     | 3.4                      | 12.1                       | 42.1       | 53.8             | 20.1             | 39.1                    | 26.3                    | 827.0       | 84.4              | 44.4                 |
| A4                           | 229.7            | 36.2    | 3.3                      | 9.7                        | 18.7       | 28.3             | 14.4             | 15.5                    | 9.9                     | 383.3       | 39.8              | 32.3                 |
| A5                           | 241.8            | 14.0    | 2.8                      | 8.6                        | 22.0       | 25.5             | 12.0             | 16.8                    | 11.7                    | 409.4       | 47.6              | 29.3                 |
| A6                           | 208.2            | 29.0    | 3.4                      | 9.4                        | 21.7       | 23.1             | 11.8             | 15.7                    | 11.3                    | 308.4       | 32.4              | 28.1                 |
| A8                           | 186.5            | 19.6    | 3.2                      | 8.5                        | 19.6       | 22.0             | 11.1             | 14.2                    | 9.7                     | 345.0       | 42.0              | 24.7                 |
| A9                           | 299.0            | 14.9    | 1.7                      | 5.8                        | 18.8       | 37.4             | 14.7             | 21.4                    | 13.7                    | 392.3       | 22.9              | 27.5                 |
| A10                          | 144.6            | 15.7    | 1.8                      | 5.0                        | 14.9       | 16.6             | 10.6             | 10.6                    | 6.0                     | 232.9       | 19.9              | 15.7                 |
| A11                          | 239.2            | 4.4     | 6.2                      | 15.1                       | 35.2       | 30.1             | 13.9             | 22.4                    | 18.4                    | 651.1       | 75.8              | 39.8                 |
| A12                          | 202.0            | 8.1     | 3.0                      | 8.1                        | 19.9       | 25.0             | 10.8             | 16.7                    | 11.3                    | 429.9       | 35.3              | 26.3                 |
| A13                          | 320.4            | 32.3    | 4.9                      | 11.7                       | 40.7       | 27.7             | 19.2             | 22.8                    | 16.2                    | 674.9       | 75.8              | 37.3                 |
| A14                          | 332.3            | 13.1    | 2.2                      | 7.6                        | 36.0       | 26.9             | 18.2             | 22.7                    | 14.0                    | 557.4       | 47.7              | 29.0                 |
| A15                          | 115.5            | 3.8     | 1.7                      | 4.5                        | 22.5       | 17.3             | 12.0             | 12.9                    | 9.6                     | 282.9       | 37.6              | 17.8                 |
| A16                          | 203.8            | 11.0    | 4.0                      | 11.3                       | 18.7       | 24.7             | 10.7             | 14.1                    | 12.0                    | 329.7       | 48.3              | 31.1                 |
| A17                          | 147.4            | 8.2     | 1.1                      | 4.4                        | 46.5       | 16.4             | 23.6             | 22.0                    | 10.3                    | 472.9       | 56.0              | 14.4                 |
| A18                          | 177.1            | 13.3    | 2.9                      | 7.9                        | 38.2       | 37.4             | 20.5             | 28.4                    | 16.7                    | 520.6       | 52.7              | 27.8                 |

Clinical characteristics and dietary intake of the participants. Subject A7 was excluded from the present study due to the lack of dietary intake data. Intake of each dietary component is based on a Brief type self administered Diet History Questionnaire (BDHQ) among the total 18 subjects. Abbreviations: CVD = cerebrovascular disease; CAD = coronary artery disease; BMI = body mass index; HbA1c = hemoglobin A1c; SU = sulfonylurea; TZD = thiazolidine; DPP4-i = dipeptidyl peptidase 4 inhibitors; SGLT2-i = sodium glucose transporter 2 inhibitors; ACE-i = angiotensin converting enzyme inhibitors; ARB = angiotensin II receptor blockers; PPI = proton pump inhibitors
